# Supplementary material for: Brain-Derived Neurotrophic Factor (BDNF) and Translocator Protein (TSPO) as Diagnostic Biomarkers for Acute Ischemic Stroke
Source: MDPI journal article supplement (doi:10.3390/diagnostics13132298), 2023-07-06
Supplement: s1 [file s1]

### Supplementary table and figure

**Table S1. Characteristics of acute ischemic stroke patients**

|                                   | (n=90)<br>N | percentage (%) |
|-----------------------------------|-------------|----------------|
| Current Smoker                    | 19          | 21.1           |
| Aspirin                           | 60          | 66.7           |
| t-PA treatment                    | 21          | 23.3           |
| Atrial Fibrillation               | 32          | 35.6           |
| NIHSS                             |             |                |
| Moderate stroke (5-15)            | 46          | 51.1           |
| Moderate to severe stroke (16-20) | 14          | 15.6           |
| Severe stroke ( $\geq 21$ )       | 21          | 23.3           |
| Modified Rankin scale ( $>3$ )    | 69          | 76.7           |
| Death                             | 11          | 12.2           |
| TOAST classification              |             |                |
| Large Artery Atherosclerosis      | 28          | 31.1           |
| Small artery Atherosclerosis      | 3           | 3.3            |
| Cardioembolism                    | 12          | 13.3           |
| Determined cause                  | 3           | 3.3            |
| Undetermined cause                | 11          | 12.2           |

t-PA- tissue Plasminogen Activator; NIHSS- National Institutes of Health Stroke Scale

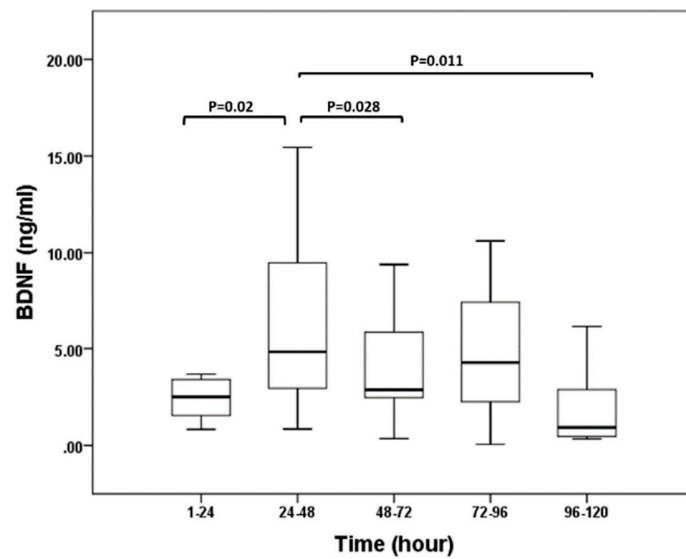

**Figure S1. Boxplots of plasma BDNF level and the sampling time categories in acute ischemic stroke patients.**

*Footnote:* 5 missing data of blood sampling time in hours were excluded. One-way ANOVA with sampling time was used ( $p=0.044$ ). Least square difference in hours for multiple comparisons: 1-24 versus 25-48 ( $p = 0.020$ ), 25-48 versus 49-72 ( $p = 0.028$ ), and 97-120 versus 25-48 ( $p = 0.011$ ). others were non-significance.

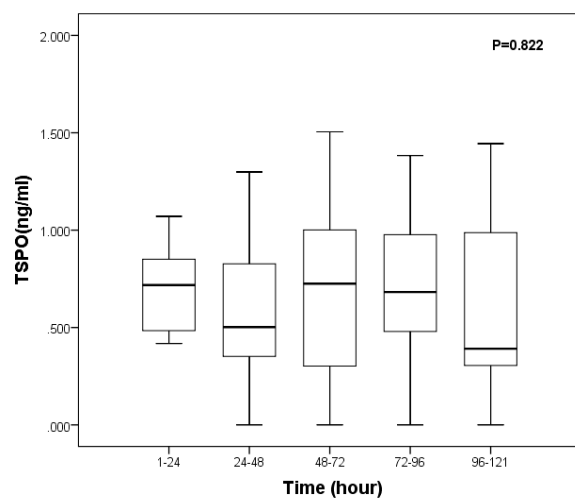

**Figure S2. Boxplots of plasma TSPO level and the sampling time categories in acute ischemic stroke patients.**

*Footnote:* 5 missing data of blood sampling time in hours were excluded. One-way ANOVA with sampling time was used ( $P=0.822$ ). all post hoc comparisons were non-significant.
